# Supplementary material for: Multidisciplinary Management of Suspected Lyme Borreliosis: Clinical Features of 569 Patients, and Factors Associated with Recovery at 3 and 12 Months, a Prospective Cohort Study
Source: MDPI journal article supplement (doi:10.3390/microorganisms10030607), 2022-03-12
Supplement: s1 [file s1]

**Supplementary file S1. Sensibility analysis: Univariate and multivariate analyses of the associated factors of rapid recovery versus partial improvement at 3 months after care at the TBD-RC – Paris and Northern region**

| Risk factor                                 | N (n=389) | n(%) cured patients at 3 months | Univariate analysis |         | Multivariate analysis |         |
|---------------------------------------------|-----------|---------------------------------|---------------------|---------|-----------------------|---------|
|                                             |           |                                 | OR [95% CI]         | P value | OR [95% CI]           | P value |
| <b>Age</b>                                  |           |                                 |                     | 0.20    |                       | 0.26    |
| <35 years-old                               | 102       | 39 (38.2)                       | 1                   |         | 1                     |         |
| 35-48 years-old                             | 97        | 25 (25.8)                       | 0.56 [0.31-1.03]    |         | 0.56 [0.29-1.06]      |         |
| 48-61 years-old                             | 92        | 29 (31.5)                       | 0.74 [0.41-1.35]    |         | 0.72 [0.38-1.38]      |         |
| >61 years-old                               | 98        | 37 (37.8)                       | 0.98 [0.55-1.73]    |         | 0.95 [0.51-1.76]      |         |
| <b>Sex</b>                                  |           |                                 |                     | 0.07    |                       | 0.98    |
| Male                                        | 146       | 57 (39.0)                       | 1.49 [0.97-2.30]    |         | 1.01 [0.63-1.60]      |         |
| Female                                      | 243       | 73 (30.0)                       | 1                   |         | 1                     |         |
| <b>History of tick-bite</b>                 |           |                                 |                     | 0.51    | -                     | -       |
| Yes                                         | 273       | 94 (34.4)                       | 1.17 [0.73-1.86]    |         |                       |         |
| No                                          | 116       | 36 (31.0)                       | 1                   |         |                       |         |
| <b>History of erythema migrans</b>          |           |                                 |                     | 0.12    | -                     | -       |
| Yes                                         | 115       | 45 (39.1)                       | 1.43 [0.91-2.25]    |         |                       |         |
| No                                          | 274       | 85 (31.0)                       | 1                   |         |                       |         |
| <b>Serology</b>                             |           |                                 |                     | 0.014   | -                     | -       |
| Positive serology in ELISA and WB           | 132       | 45 (34.1)                       | 1.30 [0.80-2.11]    |         |                       |         |
| Positive serology in ELISA only             | 54        | 19 (35.2)                       | 1.36 [0.71-2.60]    |         |                       |         |
| Negative serology in ELISA                  | 179       | 51 (28.5)                       | 1                   |         |                       |         |
| Patient with no serology (erythema migrans) | 24        | 15 (62.5)                       | 4.18 [1.72-10.16]   |         |                       |         |

|                                                                                  |     |           |                  |                  |       |
|----------------------------------------------------------------------------------|-----|-----------|------------------|------------------|-------|
| <b>Delay 1<sup>st</sup> symptoms - 1<sup>st</sup> consultation at the TBD-RC</b> |     |           |                  | 0.001            | 0.001 |
| 0-155 days (0.0 – 0.4 year)                                                      | 108 | 53 (49.1) | 1                | 1                |       |
| 155-512 days (0.4 – 1.4 years)                                                   | 107 | 41 (38.3) | 0.64 [0.37-1.11] | 0.88 [0.49-1.56] |       |
| 512-1393 days (1.4 – 3.8 years)                                                  | 91  | 24 (26.4) | 0.37 [0.20-0.68] | 0.51 [0.27-0.99] |       |
| >1393 days (> 3.8 years)                                                         | 82  | 12 (14.6) | 0.18 [0.09-0.37] | 0.22 [0.10-0.47] |       |
| <b>Delay 1<sup>st</sup> consultation at the TBD-RC - final diagnosis</b>         |     |           |                  | 0.001            | 0.001 |
| 0 day                                                                            | 163 | 80 (49.1) | 1                | 1                |       |
| 1-15 days                                                                        | 25  | 10 (40.0) | 0.69 [0.29-1.63] | 0.62 [0.26-1.51] |       |
| 15-83 days                                                                       | 105 | 23 (21.9) | 0.29 [0.17-0.51] | 0.28 [0.15-0.50] |       |
| >83 days                                                                         | 96  | 17 (17.7) | 0.22 [0.12-0.41] | 0.27 [0.14-0.52] |       |
| <b>Final diagnosis</b>                                                           |     |           |                  | 0.012            | 0.22  |
| Proven LB                                                                        | 66  | 29 (43.9) | 1.47 [0.85-2.56] | 0.93 [0.49-1.77] |       |
| Possible LB                                                                      | 32  | 9 (28.1)  | 0.74 [0.33-1.66] | 1.13 [0.46-2.75] |       |
| PTLDS or sequelae                                                                | 49  | 8 (16.3)  | 0.37 [0.16-0.82] | 0.40 [0.17-0.96] |       |
| Differential diagnosis                                                           | 242 | 84 (34.7) | 1                | 1                |       |
| <b>Number of diagnosis per patient</b>                                           |     |           |                  | 0.001            | 0.004 |
| 1 diagnosis                                                                      | 210 | 93 (44.3) | 1                | 1                |       |
| 2 diagnoses                                                                      | 106 | 24 (22.6) | 0.37 [0.22-0.63] | 0.43 [0.25-0.75] |       |
| >3 diagnoses                                                                     | 73  | 13 (17.8) | 0.27 [0.14-0.53] | 0.46 [0.23-0.93] |       |
| <b>History of antibiotics prescribed before the TBD-RC</b>                       |     |           |                  | 0.23             | -     |
| Yes                                                                              | 261 | 82 (31.4) | 0.76 [0.49-1.19] |                  |       |
| No                                                                               | 128 | 48 (37.5) | 1                |                  |       |
| <b>History of non-recommended antibiotics before the TBD-RC</b>                  |     |           |                  | 0.001            | 0.023 |

|                                                    |     |            |                  |                  |
|----------------------------------------------------|-----|------------|------------------|------------------|
| Yes                                                | 64  | 10 (15.6)  | 0.32 [0.15-0.64] | 0.41 [0.19-0.88] |
| No                                                 | 325 | 120 (36.9) | 1                | 1                |
| First line of antibiotics prescribed at the TBD-RC |     |            | 0.07             | -                |
| Yes                                                | 117 | 47 (40.2)  | 1.53 [0.97-2.40] |                  |
| No                                                 | 272 | 83 (30.5)  | 1                |                  |
| Second line of antibiotics at the TBD-RC           |     |            | 0.69             | -                |
| Yes                                                | 14  | 4 (28.6)   | 0.79 [0.24-2.57] |                  |
| No                                                 | 375 | 126 (33.6) | 1                |                  |

TBD-RC = Tick-Borne Diseases Reference Center ; PTLDS = Post-Treatment Lyme Disease Syndrome
